# Supplementary material
Source: PubMed Central journal article supplement (PMC10688324)
Supplement: NIHMS1938679-supplement-supplement.pdf [file NIHMS1938679-supplement-supplement.pdf]

**SUPPLEMENTARY MATERIAL TO ‘TWO-SAMPLE TESTS FOR  
MULTIVARIATE REPEATED MEASUREMENTS OF HISTOGRAM OBJECTS  
WITH APPLICATIONS TO WEARABLE DEVICE DATA’**

BY JINGRU ZHANG<sup>1</sup>, KATHLEEN R. MERIKANGAS<sup>2</sup>, HONGZHE LI<sup>1</sup> AND HAOCHANG SHOU<sup>1</sup>

<sup>1</sup>*University of Pennsylvania*

<sup>2</sup>*National Institutes of Health*

SUPPLEMENT A: PROOFS OF THEOREMS

**A.1. Proof of Theorem 2.1.**

PROOF. According to the following definitions

$$\begin{aligned} R_{\text{out},1} &= \sum_{(u,v) \in G_{\text{out}}} I(g_u = g_v = 1), \\ R_{\text{out},2} &= \sum_{(u,v) \in G_{\text{out}}} I(g_u = g_v = 2), \\ R_{\text{in},1} &= \sum_{(i,j) \in G_{\text{in}}} I(g_i = g_j = 1), \end{aligned}$$

we have

$$\begin{aligned} \mathbf{E}(R_{\text{out},1}) &= \sum_{(u,v) \in G_{\text{out}}} \mathbf{P}(g_u = g_v = 1) = |G_{\text{out}}| \frac{n_1(n_1 - 1)}{N(N - 1)}, \\ \mathbf{E}(R_{\text{out},2}) &= \sum_{(u,v) \in G_{\text{out}}} \mathbf{P}(g_u = g_v = 2) = |G_{\text{out}}| \frac{n_2(n_2 - 1)}{N(N - 1)}, \\ \mathbf{E}(R_{\text{in},1}) &= \sum_{(i,j) \in G_{\text{in}}} \mathbf{P}(g_i = g_j = 1) = |G_{\text{in}}| \frac{n_1}{N}. \end{aligned}$$

For  $\mathbf{Var}(R_{\text{out},1})$ , we only need to figure out  $\mathbf{E}(R_{\text{out},1}^2)$ . We have

$$\begin{aligned}
& \mathbf{E}(R_{\text{out},1}^2) \\
&= \sum_{(u,v) \in G_{\text{out}}} P(g_u = g_v = 1) + \sum_{\substack{(u,v),(u,s) \in G_{\text{out}} \\ v \neq s}} P(g_u = g_v = g_s = 1) \\
&+ \sum_{\substack{(u,v),(s,t) \in G_{\text{out}} \\ u,v,s,t \text{ are all different}}} P(g_u = g_v = g_s = g_t = 1) \\
&= |G_{\text{out}}| \frac{n_1(n_1-1)}{N(N-1)} + \sum_{u \neq v} \frac{D_{uv}(D_{uv}-1)}{2} \frac{n_1(n_1-1)}{N(N-1)} \\
&+ \sum_{u \neq v} D_{uv}(D_u - D_{uv}) \frac{n_1(n_1-1)(n_1-2)}{N(N-1)(N-2)} \\
&+ \left( |G_{\text{out}}|^2 + \sum_{u \neq v} \frac{D_{uv}^2}{2} - \sum_u D_u^2 \right) \frac{n_1(n_1-1)(n_1-2)(n_1-3)}{N(N-1)(N-2)(N-3)} \\
&= \sum_{u \neq v} \frac{D_{uv}^2}{2} \frac{n_1(n_1-1)}{N(N-1)} + \sum_{u \neq v} D_{uv}(D_u - D_{uv}) \frac{n_1(n_1-1)(n_1-2)}{N(N-1)(N-2)} \\
&+ \left( |G_{\text{out}}|^2 + \sum_{u \neq v} \frac{D_{uv}^2}{2} - \sum_u D_u^2 \right) \frac{n_1(n_1-1)(n_1-2)(n_1-3)}{N(N-1)(N-2)(N-3)}.
\end{aligned}$$

The analytic expression of  $\mathbf{Var}(R_{\text{out},2})$  can be derived in a similar way as that of  $\mathbf{Var}(R_{\text{out},1})$ .

For  $\mathbf{Cov}(R_{\text{out},1}, R_{\text{out},2})$ , we only need to figure out  $\mathbf{E}(R_{\text{out},1}, R_{\text{out},2})$ . We have

$$\begin{aligned}
\mathbf{E}(R_{\text{out},1}R_{\text{out},2}) &= \sum_{(u,v),(s,t) \in G_{\text{out}}} P(g_u = g_v = 1, g_s = g_t = 2) \\
&= \left( |G_{\text{out}}|^2 + \sum_{u \neq v} \frac{D_{uv}^2}{2} - \sum_u D_u^2 \right) \frac{n_1(n_1-1)n_2(n_2-1)}{N(N-1)(N-2)(N-3)}.
\end{aligned}$$

Then we compute  $\mathbf{E}(R_{\text{in},1}^2)$ ,  $\mathbf{E}(R_{\text{out},1}, R_{\text{in},1})$  and  $\mathbf{E}(R_{\text{out},2}, R_{\text{in},1})$  so that the analytic expressions

of  $\mathbf{Var}(R_{in,1})$ ,  $\mathbf{Cov}(R_{out,1}, R_{in,1})$  and  $\mathbf{Cov}(R_{out,2}, R_{in,1})$  can be derived immediately. We have

$$\begin{aligned}
& \mathbf{E}(R_{in,1}^2) \\
&= \sum_{(i,j) \in G_{in}} P(g_i = g_j = 1) + \sum_{\substack{(i,j),(i,k) \in G_{in} \\ j \neq k}} P(g_i = g_j = g_k = 1) \\
&+ \sum_{\substack{(i,j),(k,l) \in G_{in} \\ i,j,k,l \text{ are all different}}} P(g_i = g_j = g_k = g_l = 1) \\
&= \sum_{u=1}^N D_{uu}^2 \frac{n_1 n_2}{N(N-1)} + |G_{in}|^2 \frac{n_1(n_1-1)}{N(N-1)}, \\
& \mathbf{E}(R_{in,1} R_{out,1}) \\
&= \sum_{\substack{(i,j) \in G_{in}, i \in \mathcal{C}_s \\ (s,t) \in G_{out}}} P(g_i = g_j = g_t = 1) + \sum_{\substack{(i,j) \in G_{in}, i \notin \mathcal{C}_s, j \notin \mathcal{C}_t \\ (s,t) \in G_{out}}} P(g_i = g_j = g_s = g_t = 1) \\
&= \sum_{u=1}^N D_{uu} D_u \frac{n_1(n_1-1)}{N(N-1)} + \left( |G_{in}| |G_{out}| - \sum_{u=1}^N D_{uu} D_u \right) \frac{n_1(n_1-1)(n_1-2)}{N(N-1)(N-2)}, \\
& \mathbf{E}(R_{in,1} R_{out,2}) \\
&= \sum_{\substack{(i,j) \in G_{in}, i \notin \mathcal{C}_s, j \notin \mathcal{C}_t \\ (s,t) \in G_{out}}} P(g_i = g_j = 1, g_s = g_t = 2) \\
&= \left( |G_{in}| |G_{out}| - \sum_{u=1}^N D_{uu} D_u \right) \frac{n_1 n_2 (n_2 - 1)}{N(N-1)(N-2)}.
\end{aligned}$$

□

## A.2. Rewrite $S_R$ .

LEMMA A.1. *The statistic  $S_R$  can be rewritten in the following form*

$$S_R = (Z_{out,w}, Z_{out,d}, Z_{in}) \mathbf{\Omega}^{-1} (Z_{out,w}, Z_{out,d}, Z_{in})^T,$$

where  $\mathbf{\Omega} = \mathbf{Var}((Z_{out,w}, Z_{out,d}, Z_{in})^T)$ .

PROOF. Let

$$\mathbf{R} = \begin{pmatrix} R_{out,1} - \mathbf{E}(R_{out,1}) \\ R_{out,2} - \mathbf{E}(R_{out,2}) \\ R_{in,1} - \mathbf{E}(R_{in,1}) \end{pmatrix},$$

$$\begin{aligned}
\mathbf{Z} &= \begin{pmatrix} Z_{out,m} \\ Z_{out,d} \\ Z_{in} \end{pmatrix} \\
&= \begin{pmatrix} \frac{n_2-1}{\sqrt{\mathbf{Var}((n_2-1)R_{out,1} + (n_1-1)R_{out,2})}} & \frac{n_1-1}{\sqrt{\mathbf{Var}((n_2-1)R_{out,1} + (n_1-1)R_{out,2})}} & 0 \\ \frac{1}{\sqrt{\mathbf{Var}(R_{out,1} - R_{out,2})}} & -\frac{1}{\sqrt{\mathbf{Var}(R_{out,1} - R_{out,2})}} & 0 \\ 0 & 0 & \frac{1}{\sqrt{\mathbf{Var}(R_{in,1})}} \end{pmatrix} \mathbf{R} \\
&\triangleq \mathbf{BR}.
\end{aligned}$$

It is easy to see that  $\mathbf{B}$  is invertible. From the definition of  $S$ , it can be written as

$$S = \mathbf{R}^T \boldsymbol{\Sigma}^{-1} \mathbf{R} = (\mathbf{B}^{-1} \mathbf{Z})^T \boldsymbol{\Sigma}^{-1} (\mathbf{B}^{-1} \mathbf{Z}) = \mathbf{Z}^T (\mathbf{B} \boldsymbol{\Sigma} \mathbf{B}^T)^{-1} \mathbf{Z}.$$

Here,  $\mathbf{B} \boldsymbol{\Sigma} \mathbf{B}^T$  is the variance of  $(Z_{\text{out},w}, Z_{\text{out},d}, Z_{\text{in}})^T$ .  $\square$

**A.3. Proof of Theorem 3.1.** Applying Stein's method, we prove  $(R_{\text{out},1}, R_{\text{out},2}, R_{\text{in},1})^T$  converges in distribution to a trivariate Gaussian distribution as  $N \rightarrow \infty$  first. Consider sums of the form  $W = \sum_{i \in \mathcal{J}} \xi_i$ , where  $\mathcal{J}$  is an index set and  $\xi_i$  are random variables with  $\mathbf{E}(\xi_i) = 0$ , and  $\mathbf{E}(W^2) = 1$ . The following assumption restricts the dependence between  $\{\xi_i : i \in \mathcal{J}\}$ .

ASSUMPTION A.1. [Chen and Shao (2005), p. 17] For each  $i \in \mathcal{J}$  there exists  $S_i \subset T_i \subset \mathcal{J}$  such that  $\xi_i$  is independent of  $\xi_{S_i^c}$  and  $\xi_{S_i}$  is independent of  $\xi_{T_i^c}$ .

We will use the following theorem.

THEOREM A.2. [Chen and Shao (2005), Theorem 3.4] Under Assumption A.1, we have

$$\sup_{h \in \text{Lip}(1)} |\mathbf{E}h(W) - \mathbf{E}h(Z)| \leq \delta$$

where  $\text{Lip}(1) = \{h : \mathbb{R} \rightarrow \mathbb{R}, \|h'\| \leq 1\}$ ,  $Z$  has  $\mathcal{N}(0, 1)$  distribution and

$$\delta = 2 \sum_{i \in \mathcal{J}} (\mathbf{E}|\xi_i \eta_i \theta_i| + |\mathbf{E}(\xi_i \eta_i)| \mathbf{E}|\theta_i|) + \sum_{i \in \mathcal{J}} \mathbf{E}|\xi_i \eta_i^2|$$

with  $\eta_i = \sum_{j \in S_i} \xi_j$  and  $\theta_i = \sum_{j \in T_i} \xi_j$ , where  $S_i$  and  $T_i$  are defined in Assumption A.1.

To prove Theorem 3.1, we take one step back to study the statistic under the bootstrap null distribution, which is defined as follows: For each subject, we assign it to be from sample 1 with probability  $n_1/N$ , and from sample 2 with probability  $n_2/N$ , independently of other subjects. Let  $n_1^B$  be the number of subjects that are assigned to be from sample 1. Then, conditioning on  $n_1^B = n_1$ , the bootstrap null distribution becomes the permutation null distribution. We use  $\mathbf{P}_B, \mathbf{E}_B, \mathbf{Var}_B$  to denote the probability, expectation, and variance under the bootstrap null distribution, respectively.

Let

$$\begin{aligned} \mathbf{E}(R_{\text{out},1}) &\triangleq \mu_1, & \mathbf{E}(R_{\text{out},2}) &\triangleq \mu_2, & \mathbf{E}(R_{\text{in},1}) &\triangleq \mu_3, \\ \mathbf{Var}(R_{\text{out},1}) &\triangleq (\sigma_1)^2, & \mathbf{Var}(R_{\text{out},2}) &\triangleq (\sigma_2)^2, & \mathbf{Var}(R_{\text{in},1}) &\triangleq (\sigma_3)^2, \\ \mathbf{Cov}(R_{\text{out},1}, R_{\text{out},2}) &\triangleq \sigma_{12}, & \mathbf{Cov}(R_{\text{out},1}, R_{\text{in},1}) &\triangleq \sigma_{13}, & \mathbf{Cov}(R_{\text{out},2}, R_{\text{in},1}) &\triangleq \sigma_{23}. \end{aligned}$$

Let  $p_n = n_1/N, q_n = n_2/N$ , then  $\lim_{n \rightarrow \infty} p_n = p, \lim_{n \rightarrow \infty} q_n = q$ . Using the similar steps as in the Proof A.1, we have

$$\begin{aligned} \mathbf{E}_B(R_{\text{out},1}) &= |G_{\text{out}}| p_n^2 \triangleq \mu_1^B, \\ \mathbf{E}_B(R_{\text{out},2}) &= |G_{\text{out}}| q_n^2 \triangleq \mu_2^B, \\ \mathbf{E}_B(R_{\text{in},1}) &= |G_{\text{in}}| p_n \triangleq \mu_3^B, \\ \mathbf{Var}_B(R_{\text{out},1}) &= p_n^2 q_n^2 \left\{ \frac{1}{2} \sum_{u \neq v} D_{uv}^2 + \frac{p_n}{q_n} \sum_u D_u^2 \right\} \triangleq (\sigma_1^B)^2, \\ \mathbf{Var}_B(R_{\text{out},2}) &= p_n^2 q_n^2 \left\{ \frac{1}{2} \sum_{u \neq v} D_{uv}^2 + \frac{q_n}{p_n} \sum_u D_u^2 \right\} \triangleq (\sigma_2^B)^2, \\ \mathbf{Var}_B(R_{\text{in},1}) &= p_n q_n \sum_u D_{uu}^2 \triangleq (\sigma_3^B)^2. \end{aligned}$$

Let

$$\begin{aligned} W_1^B &= \frac{R_{\text{out},1} - \mu_1^B}{\sigma_1^B}, & W_1 &= \frac{R_{\text{out},1} - \mu_1}{\sigma_1}, \\ W_2^B &= \frac{R_{\text{out},2} - \mu_2^B}{\sigma_2^B}, & W_2 &= \frac{R_{\text{out},2} - \mu_2}{\sigma_2}, \\ W_3^B &= \frac{R_{\text{in},1} - \mu_3^B}{\sigma_3^B}, & W_3 &= \frac{R_{\text{in},1} - \mu_3}{\sigma_3}, \\ W_4^B &= \frac{n_1^B - Np_n}{\sigma_0}, & \text{where } \sigma_0^2 &= Np_n(1 - p_n). \end{aligned}$$

Under the conditions of Theorem 3.1, as  $N \rightarrow \infty$ , we can prove the following results:

- (1)  $(W_1^B, W_2^B, W_3^B, W_4^B)$  becomes multivariate Gaussian distributed under the bootstrap null.  
(2)

$$\begin{aligned} \frac{\sigma_1^B}{\sigma_1} &\rightarrow c_1, & \frac{\mu_1^B - \mu_1}{\sigma_1^B} &\rightarrow 0; & \frac{\sigma_2^B}{\sigma_2} &\rightarrow c_2, & \frac{\mu_2^B - \mu_2}{\sigma_2^B} &\rightarrow 0; \\ \frac{\sigma_3^B}{\sigma_3} &\rightarrow c_3, & \frac{\mu_3^B - \mu_3}{\sigma_3^B} &\rightarrow 0, \end{aligned}$$

where  $c_1, c_2$  and  $c_3$  are constants.

(3)

$$\begin{aligned} |\lim_{N \rightarrow \infty} \mathbf{Cor}(W_1, W_2)| &< 1, & |\lim_{N \rightarrow \infty} \mathbf{Cor}(W_1, W_3)| &< 1, \\ |\lim_{N \rightarrow \infty} \mathbf{Cor}(W_2, W_3)| &< 1. \end{aligned}$$

From (1) and given that  $\mathbf{Var}_B(W_4^B) = 1$ , the conditional distribution of  $(W_1^B, W_2^B, W_3^B)^T$  given  $W_4^B$  is a trivariate Gaussian distribution under the bootstrap null distribution as  $N \rightarrow \infty$ . Since the permutation null distribution is equivalent to the bootstrap null distribution given  $W_4^B = 0$ ,  $(W_1^B, W_2^B, W_3^B)^T$  follows a trivariate Gaussian distribution under the permutation null distribution as  $N \rightarrow \infty$ . Since

$$\begin{aligned} W_1 &= \frac{\sigma_1^B}{\sigma_1} \left( W_1^B + \frac{\mu_1^B - \mu_1}{\sigma_1^B} \right), & W_2 &= \frac{\sigma_2^B}{\sigma_2} \left( W_2^B + \frac{\mu_2^B - \mu_2}{\sigma_2^B} \right), \\ W_3 &= \frac{\sigma_3^B}{\sigma_3} \left( W_3^B + \frac{\mu_3^B - \mu_3}{\sigma_3^B} \right), \end{aligned}$$

given (2), we have  $(W_1, W_2, W_3)^T$  follows a trivariate Gaussian distribution under the permutation null distribution as  $N \rightarrow \infty$ . Together with (3), we can conclude that  $(R_{\text{out},1}, R_{\text{out},2}, R_{\text{in},1})^T$  converges in distribution to a trivariate Gaussian distribution as  $N \rightarrow \infty$ . In the following, we prove the results (1)–(3).

To prove (1), by Cramér-Wold device, we only need to show that  $W = a_1 W_1^B + a_2 W_2^B + a_3 W_3^B + a_4 W_4^B$  is asymptotically Gaussian distributed for any combination of  $a_1, a_2, a_3, a_4$  such that  $\mathbf{Var}_B(W) > 0$ .

We first define more notations. For an edge  $(u, v)$  of  $G_{\text{out}}$ , i.e.,  $uv \in \mathcal{J}_1 = \{uv : u < v, (u, v) \in G_{\text{out}}\}$ , let

$$\xi_{uv} = a_1 \frac{I(g_u = g_v = 1) - p_n^2}{\sigma_1^B} + a_2 \frac{I(g_u = g_v = 2) - q_n^2}{\sigma_2^B}.$$

For an edge  $(k, l)$  of  $G_{\text{in}}$ , i.e.,  $kl \in \mathcal{J}_2 = \{kl : k < l, (k, l) \in G_{\text{in}}\}$ , let

$$\xi_{kl} = a_3 \frac{I(g_k = g_l = 1) - p_n}{\sigma_3^B}.$$

And for a subject  $s \in \mathcal{J}_3 = \{1, \dots, N\}$ , let

$$\xi_s = a_4 \frac{I(g_s = 1) - p_n}{\sigma_0}.$$

Thus,

$$W = a_1 W_1^B + a_2 W_2^B + a_3 W_3^B + a_4 W_4^B = \sum_{i \in \mathcal{J}} \xi_i,$$

where  $\mathcal{J} = \mathcal{J}_1 \cup \mathcal{J}_2 \cup \mathcal{J}_3$ .

For an edge  $e = (u, v) \in G_{\text{out}}$ , let

$$C_{\text{out},e} = \{u, v\} \cup \{s \in \{1, \dots, N\} : s \text{ is connected to } u \text{ or } v \text{ in } G_{\text{out}}\}.$$

For an edge  $e = (i, j) \in G_{\text{in}}$ ,  $i, j \in \mathcal{C}_u$ , let

$$C_{\text{in},e} = \{u\} \cup \{s \in \{1, \dots, N\} : s \text{ is connected to } u \text{ in } G_{\text{out}}\}.$$

We define

$$C_e = C_{\text{out},e} I(e \in G_{\text{out}}) + C_{\text{in},e} I(e \in G_{\text{in}})$$

and introduce following index sets to satisfy Assumption A.1. For  $i \in \mathcal{J}_1$  (i.e.,  $i$  is an edge  $(u, v) \in G_{\text{out}}$ ), let

$$\begin{aligned} S_i &= A_i \cup \{u, v\}, \\ T_i &= B_i \cup C_i. \end{aligned}$$

For  $i \in \mathcal{J}_2 \cup \mathcal{J}_3$  (i.e.,  $i$  is an edge  $(k, l) \in G_{\text{in}}$ ,  $k, l \in \mathcal{C}_s$  or  $i$  is a subject  $s \in \mathcal{J}_3$ ),

$$\begin{aligned} S_i &= A_i \cup \{s\}, \\ T_i &= B_i \cup C_i. \end{aligned}$$

Then  $S_i$  and  $T_i$  satisfy Assumption A.1.

Let  $a = \max\{|a_1|, |a_2|, |a_3|, |a_4|\}$  and  $\sigma = \min\{\sigma_1^B, \sigma_2^B, \sigma_3^B, \sigma_0\}$ . Since

$$|\xi_i| \leq \begin{cases} 2a/\sigma & \text{if } i \in \mathcal{J}_1, \\ a/\sigma & \text{if } i \in \mathcal{J}_2 \cup \mathcal{J}_3, \end{cases}$$

we have

$$\sum_{j \in S_i} |\xi_j| \leq (|A_i| + 2)2a/\sigma, \quad \sum_{j \in T_i} |\xi_j| \leq (|B_i| + |C_i|)2a/\sigma, \quad i \in \mathcal{J},$$

and the terms  $\mathbf{E}|\xi_i \eta_i \theta_i|$ ,  $|\mathbf{E}(\xi_i \eta_i)| \mathbf{E}|\theta_i|$  and  $\mathbf{E}|\xi_i \eta_i^2|$  are all bounded by

$$\frac{32a^3}{\sigma^3} |A_i| |B_i|.$$

So we have

$$\begin{aligned}\delta &= \frac{1}{\sqrt{(\mathbf{Var}_B(W))^3}} \left\{ 2 \sum_{i \in \mathcal{J}} (\mathbf{E}_B |\xi_i \eta_i \theta_i| + |\mathbf{E}_B(\xi_i \eta_i)| \mathbf{E}_B |\theta_i|) + \sum_{i \in \mathcal{J}} \mathbf{E}_B |\xi_i \eta_i^2| \right\} \\ &\leq \frac{1}{\sqrt{(\mathbf{Var}_B(W))^3}} \frac{160a^3}{\sigma^3} \sum_{i \in \mathcal{J}} |A_i| |B_i| \\ &\leq \frac{480a^3}{\sigma^3 \sqrt{(\mathbf{Var}_B(W))^3}} \sum_{e \in G_{\text{out}}} |A_{\text{out},e}| |B_{\text{out},e}|\end{aligned}$$

Since  $480a^3/\sqrt{(\mathbf{Var}_B(W))^3}$  is of constant order and  $\sigma = O(N^{0.5})$ , we have  $\delta \rightarrow 0$  when  $\sum_{e \in G_{\text{out}}} |A_{\text{out},e}| |B_{\text{out},e}| = o(N^{1.5})$ .

Next we prove result (2). Since  $|G_{\text{out}}| = O(N)$  and  $\sum_u D_u^2 - 4|G_{\text{out}}|^2/N = O(N)$ , let  $\lim_{N \rightarrow \infty} |G_{\text{out}}|/N = b_1$  and  $\lim_{N \rightarrow \infty} \sum_u D_u^2/N - 4|G_{\text{out}}|^2/N^2 = b_2$ ,  $b_1, b_2 \in (0, \infty)$ . Then  $\lim_{N \rightarrow \infty} \sum_u D_u^2/N = 4b_1^2 + b_2$ , i.e.,  $\sum_u D_u^2 = O(N)$ . Since

$$2|G_{\text{out}}| = \sum_{u \neq v} D_{uv} \leq \sum_{u \neq v} D_{uv}^2 \leq \sum_u D_u^2,$$

we have  $\sum_{u \neq v} D_{uv}^2 = O(N)$  and let  $\lim_{N \rightarrow \infty} \sum_{u \neq v} D_{uv}^2/N = b_3 \in (0, \infty)$ . Hence, as  $N \rightarrow \infty$

$$\begin{aligned}\frac{(\sigma_1^B)^2}{N} &\rightarrow p^2 q^2 \left\{ \frac{1}{2} b_3 + \frac{p}{q} (4b_1^2 + b_2) \right\}, \\ \frac{(\sigma_1)^2}{N} &\rightarrow p^2 q^2 \left\{ \frac{1}{2} b_3 + \frac{p}{q} b_2 \right\}, \\ \frac{\sigma_1^B}{\sigma_1} &\rightarrow \sqrt{1 + \frac{8pb_1^2}{qb_3 + 2pb_2}}.\end{aligned}$$

Similarly, we have

$$\frac{\sigma_2^B}{\sigma_2} \rightarrow \sqrt{1 + \frac{8qb_1^2}{pb_3 + 2qb_2}}.$$

Since  $|G_{\text{in}}| = O(N)$  and  $\sum_u D_{uu}^2 - |G_{\text{in}}|^2/N = O(N)$ , let  $\lim_{N \rightarrow \infty} |G_{\text{in}}|/N = b_4$  and  $\lim_{N \rightarrow \infty} \sum_u D_{uu}^2/N - |G_{\text{in}}|^2/N^2 = b_5$ ,  $b_4, b_5 \in (0, \infty)$ . Then  $\lim_{N \rightarrow \infty} \sum_u D_{uu}^2/N = b_4^2 + b_5$ , and we have

$$\begin{aligned}\frac{(\sigma_3^B)^2}{N} &\rightarrow pq(b_4^2 + b_5), \\ \frac{(\sigma_3)^2}{N} &\rightarrow pqb_5, \\ \frac{\sigma_3^B}{\sigma_3} &\rightarrow \sqrt{1 + \frac{b_4^2}{b_5}}.\end{aligned}$$

Also,

$$\mu_1^B - \mu_1 = |G_{\text{out}}| \frac{n_1 n_2}{N^2(N-1)},$$

so

$$\lim_{N \rightarrow \infty} \frac{\mu_1^B - \mu_1}{\sigma_1^B} = 0.$$

Similarly, we have

$$\lim_{N \rightarrow \infty} \frac{\mu_2^B - \mu_2}{\sigma_2^B} = 0.$$

Since  $\mu_3^B - \mu_3 = 0$ ,

$$\lim_{N \rightarrow \infty} \frac{\mu_3^B - \mu_3}{\sigma_3^B} = 0.$$

Last, we prove result (3). As  $N \rightarrow \infty$ ,

$$\frac{\sigma_{12}}{N} \rightarrow p^2 q^2 \left\{ \frac{1}{2} b_3 - b_2 \right\}.$$

We have

$$\begin{aligned} \lim_{N \rightarrow \infty} \mathbf{Cor}(W_1, W_2) &= \lim_{N \rightarrow \infty} \frac{\sigma_{12}}{\sqrt{(\sigma_1)^2 (\sigma_2)^2}} \\ &= \frac{b_3 - 2b_2}{\sqrt{(b_3 - 2b_2)^2 + 2b_2 b_3 / pq}}, \end{aligned}$$

Strictly positive  $2b_2 b_3 / pq$  implies  $|\lim_{N \rightarrow \infty} \mathbf{Cor}(W_1, W_2)| < 1$ . Note that

$$|G_{\text{in}}| = \sum_u D_{uu} \leq \sum_u D_{uu} D_u \leq \sqrt{\sum_u D_{uu}^2} \sqrt{\sum_u D_u^2},$$

$|G_{\text{in}}| = O(N)$ ,  $\sum_u D_{uu}^2 = O(N)$  and  $\sum_u D_u^2 = O(N)$ . We have  $\sum_u D_{uu} D_u = O(N)$  and let  $\lim_{N \rightarrow \infty} \sum_u D_{uu} D_u / N = b_6 \in (0, \infty)$ . Thus,

$$\frac{\sigma_{13}}{N} \rightarrow p^2 q (b_6 - 2b_1 b_4),$$

and

$$\begin{aligned} \lim_{N \rightarrow \infty} \mathbf{Cor}(W_1, W_3) &= \lim_{N \rightarrow \infty} \frac{\sigma_{13}}{\sqrt{(\sigma_1)^2 (\sigma_3)^2}} \\ &= \frac{p^2 q (b_6 - 2b_1 b_4)}{\sqrt{\frac{1}{2} p^3 q^3 b_3 b_5 + p^4 q^2 b_2 b_5}}, \end{aligned}$$

Note that

$$\left| \frac{\sum_{u=1}^N D_{uu} D_u - \frac{2}{N} |G_{\text{in}}| |G_{\text{out}}|}{\sqrt{(\sum_{u=1}^N D_u^2 - \frac{4|G_{\text{out}}|^2}{N})(\sum_{u=1}^N D_{uu}^2 - \frac{|G_{\text{in}}|^2}{N})}} \right| = |\mathbf{Cor}(Z_{\text{out},d}, Z_{\text{in}})| \leq 1,$$

so

$$\left| \frac{b_6 - 2b_1 b_4}{\sqrt{b_2 b_5}} \right| = \left| \lim_{N \rightarrow \infty} \frac{\sum_{u=1}^N D_{uu} D_u - \frac{2}{N^2} |G_{\text{in}}| |G_{\text{out}}|}{\sqrt{(\sum_{u=1}^N \frac{D_u^2}{N} - \frac{4|G_{\text{out}}|^2}{N^2})(\sum_{u=1}^N \frac{D_{uu}^2}{N} - \frac{|G_{\text{in}}|^2}{N^2})}} \right| \leq 1.$$

We have  $|\lim_{N \rightarrow \infty} \mathbf{Cor}(W_1, W_3)| < 1$ , since  $p^3 q^3 b_3 b_5 / 2$  is strictly positive. Similarly, we obtain  $|\lim_{N \rightarrow \infty} \mathbf{Cor}(W_2, W_3)| < 1$ .

Since  $(Z_{\text{out},w}, Z_{\text{out},d}, Z_{\text{in}})^T$  is the linear transformation of  $(R_{\text{out},1}, R_{\text{out},2}, R_{\text{in},1})^T$ , the proof above implies  $(Z_{\text{out},w}, Z_{\text{out},d}, Z_{\text{in}})^T$  converges in distribution to a trivariate Gaussian distribution with



mean  $\mathbf{0}$  and covariance matrix  $\Gamma$ . As shown in Proof A.2, the linear transformation is nondegenerate. Thus  $\Gamma$  is invertible and  $\Gamma = \begin{pmatrix} 1 & 0 & 0 \\ 0 & 1 & \rho_Z \\ 0 & \rho_Z & 1 \end{pmatrix}$ , where

$$\rho_Z = \lim_{N \rightarrow \infty} \frac{\sum_{u=1}^N D_{uu} D_u - \frac{2}{N} |G_{\text{in}}| |G_{\text{out}}|}{\sqrt{(\sum_{u=1}^N D_u^2 - \frac{4|G_{\text{out}}|^2}{N})(\sum_{u=1}^N D_{uu}^2 - \frac{|G_{\text{in}}|^2}{N})}} = \frac{b_6 - 2b_1 b_4}{\sqrt{b_2 b_5}}$$

and  $|\rho_Z| < 1$ .

SUPPLEMENT B: ADDITIONAL SIMULATION RESULTS FOR DATA WITH AN  
EXPONENTIALLY DECAYED WITHIN-SUBJECT CORRELATION

(1) Simulations for one-dimensional density,  $p = 1$ .

TABLE 1

*Parameter values for 5 different simulation settings for comparison one-dimensional density functions.*

---

A1': null model.  
 $\rho_1 = 0.6, \beta_1 = 0, \epsilon_1 = 1, \nu_{11} = 1, \nu_{12} = 2;$   
 $\rho_2 = 0.6, \beta_2 = 0, \epsilon_2 = 1, \nu_{21} = 1, \nu_{22} = 2; \sigma = 1.$

A2': within-subject variability difference in  $\rho$ .  
 $\rho_1 = 0, \beta_1 = 0, \epsilon_1 = 1, \nu_{11} = 1, \nu_{12} = 1.2;$   
 $\rho_2 = 0.9, \beta_2 = 0, \epsilon_2 = 1, \nu_{21} = 1, \nu_{22} = 1.2; \sigma = 1.$

A3': between-subject mean difference in  $\beta$  and  $\nu_{\cdot 1} + \nu_{\cdot 2}$ .  
 $\rho_1 = 0, \beta_1 = 0, \epsilon_1 = 1, \nu_{11} = 1, \nu_{12} = 1.2;$   
 $\rho_2 = 0, \beta_2 = 0.7, \epsilon_2 = 1, \nu_{21} = 0.96, \nu_{22} = 1.16; \sigma = 1.$

A4': between-subject variability difference in  $\epsilon$  and  $\nu_{\cdot 2} - \nu_{\cdot 1}$ .  
 $\rho_1 = 0, \beta_1 = 0, \epsilon_1 = 1, \nu_{11} = 1, \nu_{12} = 1.3;$   
 $\rho_2 = 0, \beta_2 = 0, \epsilon_2 = 1.1, \nu_{21} = 0.97, \nu_{22} = 1.33; \sigma = 1.$

A5': within-subject variability difference in  $\rho$ , between-subject mean difference in  $\beta$   
and  $\nu_{\cdot 1} + \nu_{\cdot 2}$ , variance difference in  $\epsilon$  and  $\nu_{\cdot 2} - \nu_{\cdot 1}$ .  
 $\rho_1 = 0, \beta_1 = 0, \epsilon_1 = 1, \nu_{11} = 1, \nu_{12} = 1.3;$   
 $\rho_2 = 0.35, \beta_2 = 0.5, \epsilon_2 = 1.1, \nu_{21} = 0.97, \nu_{22} = 1.36; \sigma = 1.$

---

TABLE 2

*Empirical power of the proposed test statistics in the first 6 columns, generalized edge-count test ( $S_1, S_2$ ) and Fréchet test ( $Fretest1, Fretest2$ ) at 0.05 significance level under the five scenarios denoted by A1'–A5'. Those above 95 percentage of the best power under A2'–A5' are in bold.*

|     | $T_{in}$          | $Z_{out,w}$  | $T_{out,d}$  | $M_{out}$    | $S_R$        | $M$          | $S_1$ | $S_2$        | Fretest1 | Fretest2 |
|-----|-------------------|--------------|--------------|--------------|--------------|--------------|-------|--------------|----------|----------|
|     | Null model        |              |              |              |              |              |       |              |          |          |
| A1' | 0.057             | 0.055        | 0.046        | 0.061        | 0.055        | 0.063        | 0.056 | 0.047        | 0.048    | 0.054    |
|     | Alternative model |              |              |              |              |              |       |              |          |          |
| A2' | <b>0.966</b>      | 0.050        | 0.149        | 0.111        | 0.851        | 0.901        | 0.153 | <b>1.000</b> | 0.463    | 0.056    |
| A3' | 0.036             | <b>0.970</b> | 0.071        | <b>0.960</b> | 0.914        | <b>0.949</b> | 0.640 | 0.555        | 0.293    | 0.288    |
| A4' | 0.053             | 0.186        | <b>0.908</b> | 0.859        | 0.790        | 0.814        | 0.140 | 0.062        | 0.304    | 0.277    |
| A5' | 0.067             | 0.697        | <b>0.993</b> | <b>0.995</b> | <b>0.986</b> | <b>0.991</b> | 0.398 | 0.391        | 0.467    | 0.333    |

(2) Simulations for moderate-dimensional density,  $p = 30$ .

TABLE 3

Parameter values for 5 different simulation settings for comparison 30-dimensional density functions.

---

B1': null model.  
 $\rho_1 = 0.3, \beta_1 = \mathbf{0}_p, \epsilon_1 = 1, \nu_{11} = 1, \nu_{12} = 2;$   
 $\rho_2 = 0.3, \beta_2 = \mathbf{0}_p, \epsilon_2 = 1, \nu_{21} = 1, \nu_{22} = 2; \sigma = 1.$

B2': within-subject variability difference in  $\rho$ .  
 $\rho_1 = 0, \beta_1 = \mathbf{0}_p, \epsilon_1 = 1, \nu_{11} = 1, \nu_{12} = 1.3;$   
 $\rho_2 = 0.25, \beta_2 = \mathbf{0}_p, \epsilon_2 = 1, \nu_{21} = 1, \nu_{22} = 1.3; \sigma = 1.$

B3': between-subject mean difference in  $\beta$  and  $\nu_1 + \nu_2$ .  
 $\rho_1 = 0, \beta_1 = \mathbf{0}_p, \epsilon_1 = 1, \nu_{11} = 1, \nu_{12} = 1.3;$   
 $\rho_2 = 0, \beta_2 = 0.11p, \epsilon_2 = 1, \nu_{21} = 1.2, \nu_{22} = 1.5; \sigma = 1.$

B4': between-subject variability difference in  $\epsilon$  and  $\nu_2 - \nu_1$ .  
 $\rho_1 = 0, \beta_1 = \mathbf{0}_p, \epsilon_1 = 1, \nu_{11} = 1, \nu_{12} = 1.3;$   
 $\rho_2 = 0, \beta_2 = \mathbf{0}_p, \epsilon_2 = 1.1, \nu_{21} = 0.8, \nu_{22} = 1.5; \sigma = 1.$

B5': within-subject variability difference in  $\rho$ , between-subject mean difference in  $\beta$  and  $\nu_1 + \nu_2$ , variance difference in  $\epsilon$  and  $\nu_2 - \nu_1$ .  
 $\rho_1 = 0, \beta_1 = \mathbf{0}_p, \epsilon_1 = 1, \nu_{11} = 1, \nu_{12} = 1.3;$   
 $\rho_2 = 0.22, \beta_2 = 0.21p, \epsilon_2 = 1.03, \nu_{21} = 1, \nu_{22} = 1.4; \sigma = 1.$

---

TABLE 4

Empirical power of the proposed test statistics in the first 6 columns, generalized edge-count test ( $S1, S2$ ) and Fréchet test ( $Fretest1, Fretest2$ ) at 0.05 significance level under the five scenarios denoted by  $B1'-B5'$ . Those above 95 percentage of the best power under  $B2'-B5'$  are in bold.

|     | $T_{in}$          | $Z_{out,w}$  | $T_{out,d}$  | $M_{out}$    | $S_R$        | $M$          | $S1$  | $S2$  | Fretest1     | Fretest2     |
|-----|-------------------|--------------|--------------|--------------|--------------|--------------|-------|-------|--------------|--------------|
|     | Null model        |              |              |              |              |              |       |       |              |              |
| B1' | 0.041             | 0.058        | 0.039        | 0.045        | 0.049        | 0.051        | 0.047 | 0.050 | 0.050        | 0.066        |
|     | Alternative model |              |              |              |              |              |       |       |              |              |
| B2' | <b>0.934</b>      | 0.054        | 0.046        | 0.043        | 0.838        | 0.852        | 0.212 | 0.054 | 0.485        | 0.079        |
| B3' | 0.057             | <b>0.945</b> | 0.049        | <b>0.916</b> | 0.812        | 0.893        | 0.772 | 0.717 | 0.118        | 0.181        |
| B4' | 0.144             | 0.241        | <b>0.882</b> | 0.835        | 0.774        | 0.806        | 0.720 | 0.800 | <b>0.859</b> | <b>0.883</b> |
| B5' | <b>0.892</b>      | 0.668        | 0.131        | 0.596        | <b>0.911</b> | <b>0.906</b> | 0.756 | 0.483 | 0.853        | 0.461        |

SUPPLEMENT C: ADDITIONAL RESULTS ON COMPARISON OF ASYMPTOTIC  
 $P$ -VALUES AND PERMUTATION  $P$ -VALUES

We next examine whether the asymptotic  $p$ -values are close to the  $p$ -values obtained based on 10,000 permutations. We consider the data generating procedure in Section 4.1 with the parameters set as those in model (A5). In particular, under the chosen sample sizes  $n_1=n_2=25, 50, 75$  and 100, data were generated over 100 simulation runs. For each run, we estimate the asymptotic  $p$ -values and permutation  $p$ -values over 10,000 permutations.

Figure 4 shows the empirical powers of each test estimated by the asymptotic and permutation  $p$ -values over the 100 runs for  $n_1=n_2=25, 50, 75, 100$ . The results show that the power obtained by the asymptotic  $p$ -value is very close to that based on the permutation  $p$ -value for all the proposed test statistics. As sample size increases, the results are almost identical as expected. We also provide the comparison of asymptotic  $p$ -value and permutation  $p$ -value over 100 simulation runs in the Supplementary Material.

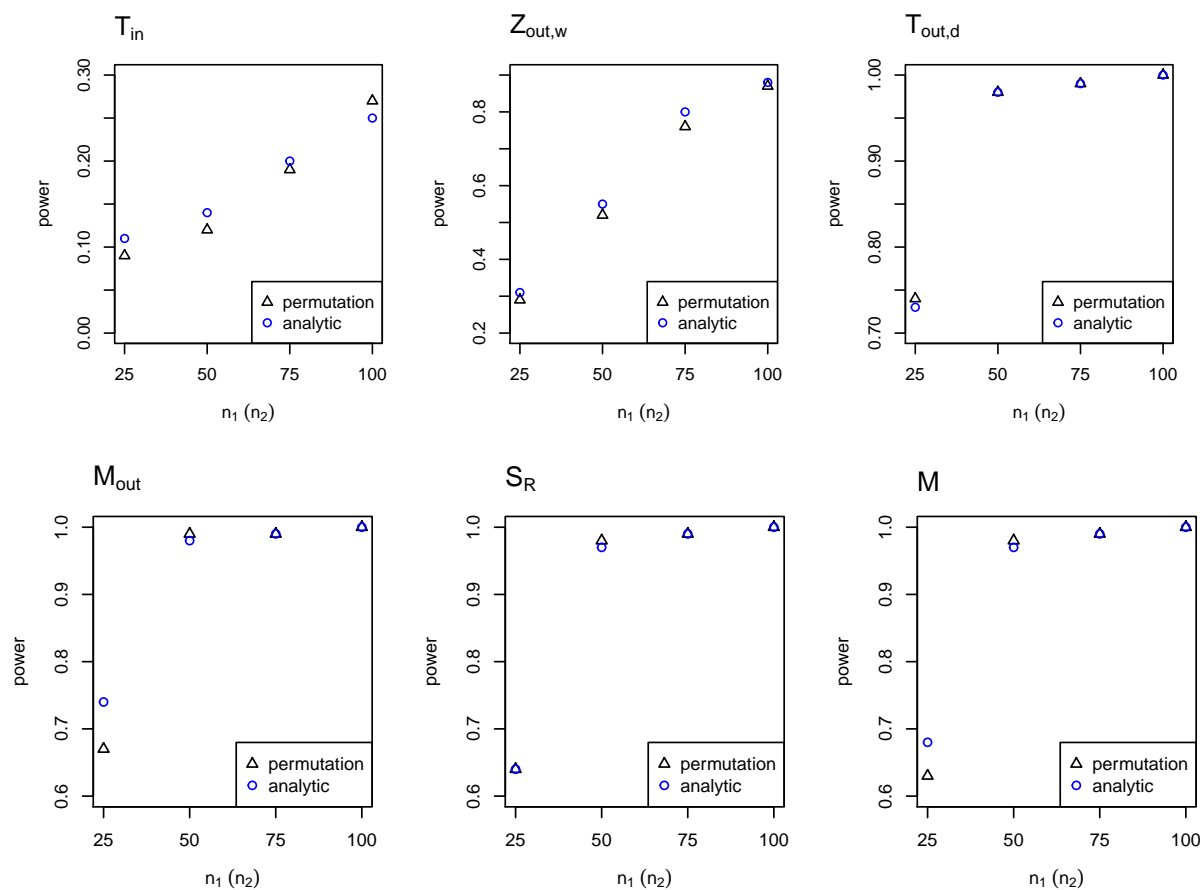

FIG 1. Comparison of the empirical power estimated by the asymptotic  $p$ -value and by the  $p$ -value calculated from 10,000 permutations for different proposed test statistics.

Figures 2 and 3 show the comparison of asymptotic  $p$ -value and permutation  $p$ -value over 100 simulation runs. The results show that the asymptotic  $p$ -values are very similar to that based on the permutation  $p$ -value for all the proposed test statistics. As sample size increases, the results are almost identical as expected.

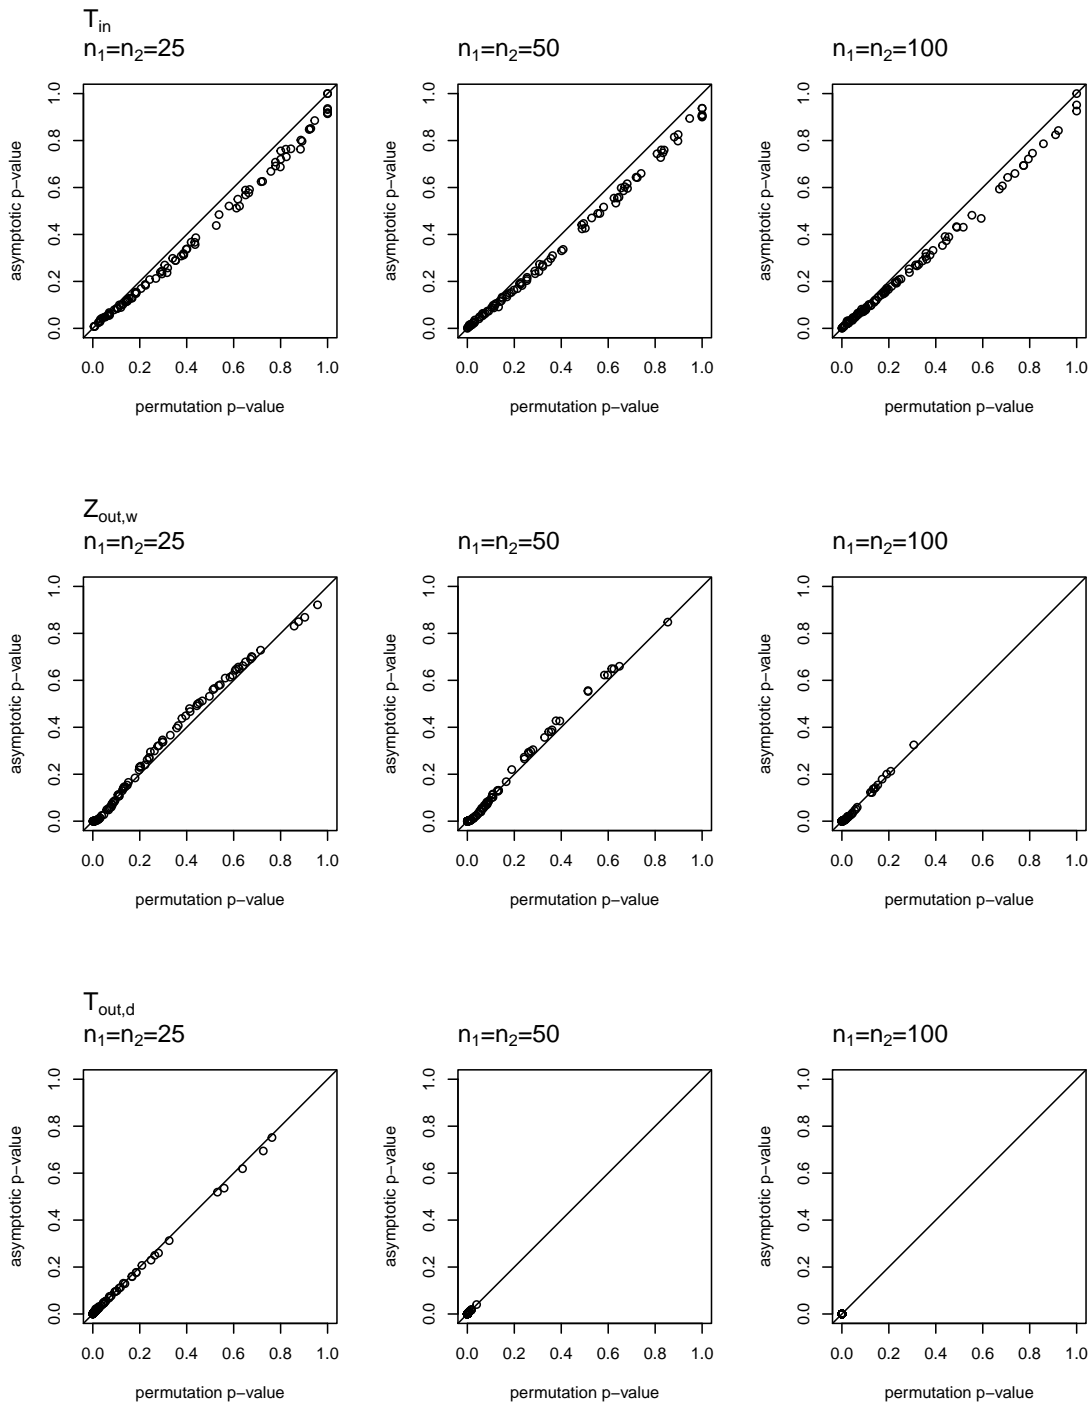

FIG 2. Compare the asymptotic  $p$ -value with the  $p$ -value calculated from 10,000 permutations with 100 simulations for test statistics  $T_{in}$ ,  $Z_{out,w}$  and  $T_{out,d}$ .

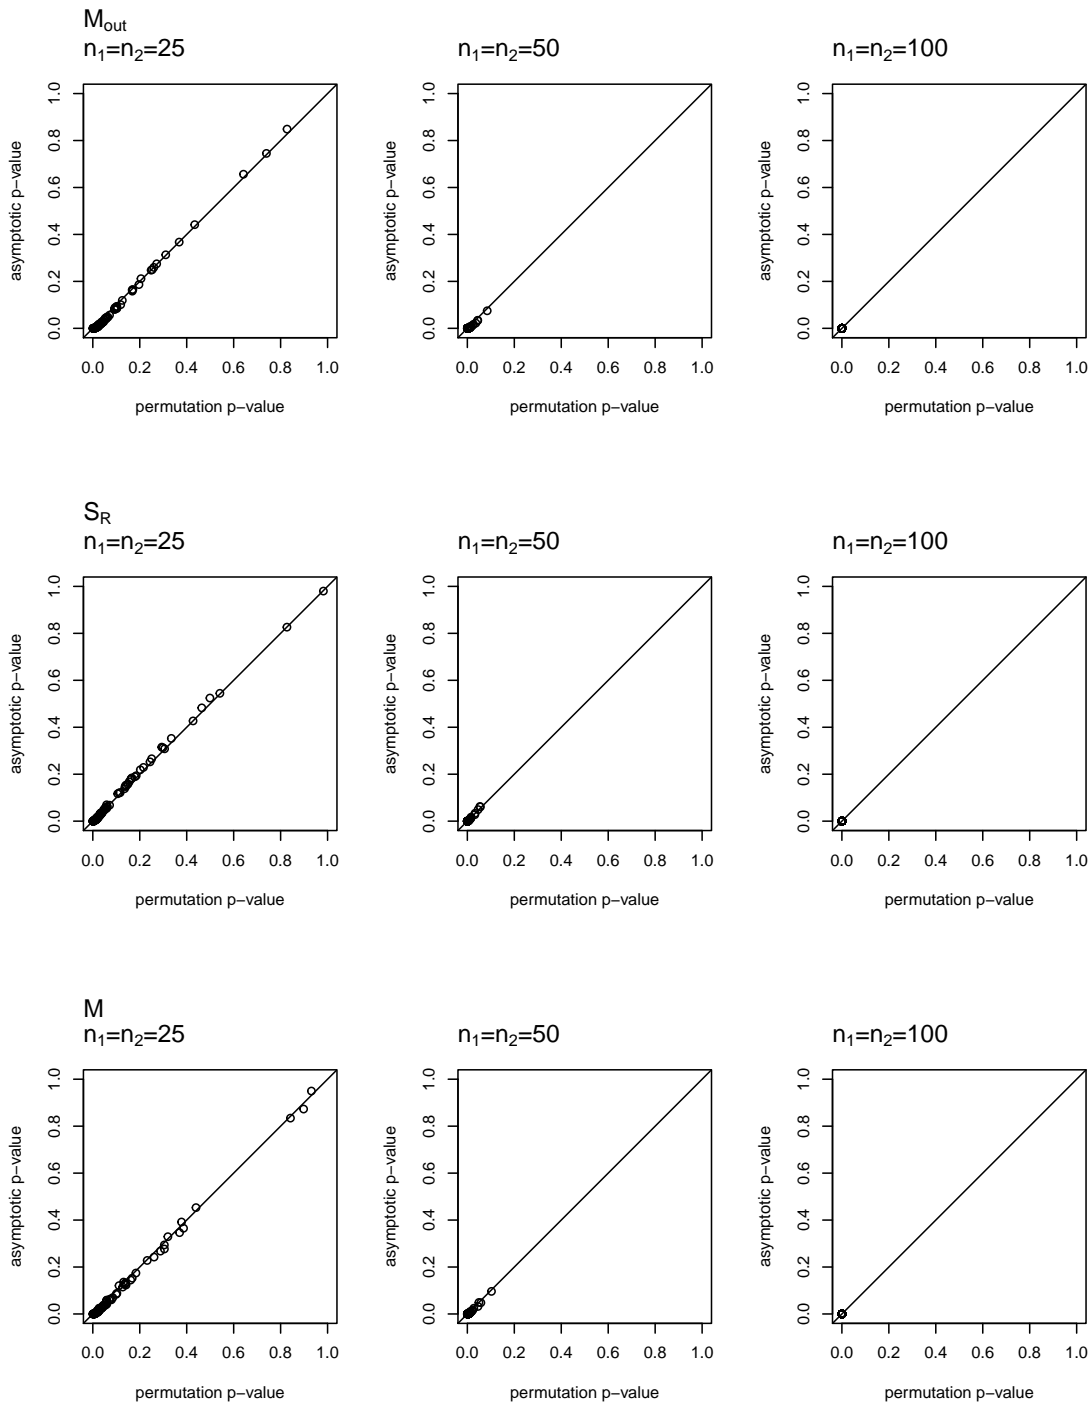

FIG 3. Compare the asymptotic  $p$ -value with the  $p$ -value calculated from 10,000 permutations with 100 simulations for test statistics  $M_{out}(1.14)$ ,  $S_R$  and  $M(1, 1.14)$ .

SUPPLEMENT D: DETAILED  $P$ -VALUES IN REAL DATA ANALYSIS

TABLE 5

Comparisons of activity distributions among the controls, MDD, BPI and BPII patients. The  $p$ -values are presented for the proposed test statistics, the generalized edge-count tests ( $S_1$ ,  $S_2$ ) and Fréchet tests ( $Fretest1$ ,  $Fretest2$ ) (bold for those  $< 0.05$ ).

| weekdays, $n_1 = 117$ , $n_2 = 106$ , $n_3 = 26$ , $n_4 = 32$ . |          |              |             |              |              |              |              |              |              |              |
|-----------------------------------------------------------------|----------|--------------|-------------|--------------|--------------|--------------|--------------|--------------|--------------|--------------|
|                                                                 | $T_{in}$ | $Z_{out,w}$  | $T_{out,d}$ | $M_{out}$    | $S_R$        | $M$          | $S_1$        | $S_2$        | Fretest1     | Fretest2     |
| HC vs MDD                                                       | 0.729    | 0.625        | 0.307       | 0.428        | 0.567        | 0.566        | 0.472        | 0.171        | 0.381        | 0.305        |
| HC vs BPII                                                      | 0.777    | 0.442        | 0.238       | 0.345        | 0.550        | 0.488        | 0.305        | 0.053        | 0.661        | 0.231        |
| HC vs BPI                                                       | 0.770    | 0.061        | 0.867       | 0.140        | 0.405        | 0.205        | 0.734        | 0.734        | 0.262        | 0.105        |
| MDD vs BPII                                                     | 0.708    | 0.464        | 0.067       | 0.116        | 0.155        | 0.169        | 0.243        | 0.133        | 0.708        | 0.769        |
| MDD vs BPI                                                      | 0.746    | 0.119        | 0.617       | 0.272        | 0.539        | 0.377        | 0.693        | 0.680        | 0.703        | 0.491        |
| BPII vs BPI                                                     | 0.718    | 0.055        | 0.119       | 0.107        | 0.088        | 0.156        | 0.286        | 0.151        | 0.123        | 0.127        |
| weekends, $n_1 = 116$ , $n_2 = 98$ , $n_3 = 30$ , $n_4 = 33$ .  |          |              |             |              |              |              |              |              |              |              |
|                                                                 | $T_{in}$ | $Z_{out,w}$  | $T_{out,d}$ | $M_{out}$    | $S_R$        | $M$          | $S_1$        | $S_2$        | Fretest1     | Fretest2     |
| HC vs MDD                                                       | 0.404    | 0.623        | 0.700       | 0.780        | 0.695        | 0.632        | 0.471        | 0.710        | 0.061        | 0.060        |
| HC vs BPII                                                      | 0.652    | 0.618        | 0.658       | 0.747        | 0.817        | 0.781        | 0.498        | 0.404        | 0.539        | 0.515        |
| HC vs BPI                                                       | 0.287    | <b>0.003</b> | 0.068       | <b>0.005</b> | <b>0.005</b> | <b>0.006</b> | 0.063        | <b>0.018</b> | <b>0.014</b> | <b>0.002</b> |
| MDD vs BPII                                                     | 0.714    | 0.451        | 0.848       | 0.813        | 0.885        | 0.828        | 0.482        | 0.728        | 0.274        | 0.317        |
| MDD vs BPI                                                      | 0.744    | 0.085        | 0.317       | 0.161        | 0.297        | 0.237        | 0.154        | 0.133        | 0.480        | 0.288        |
| BPII vs BPI                                                     | 0.699    | <b>0.002</b> | 0.250       | <b>0.004</b> | <b>0.017</b> | <b>0.005</b> | <b>0.005</b> | 0.054        | <b>0.007</b> | <b>0.005</b> |

TABLE 6

Comparisons of activity distributions in different age groups, where  $C1$ ,  $C2$  and  $C3$  denoting young, middle-aged and older age groups. The  $p$ -values of the proposed test statistics, the generalized edge-count tests ( $S_1$ ,  $S_2$ ) and Fréchet tests ( $Fretest1$ ,  $Fretest2$ ) are presented for different comparisons (bold for those  $< 0.05$ ).

| weekdays       |              |                 |              |                 |                 |                 |                 |                 |              |              |
|----------------|--------------|-----------------|--------------|-----------------|-----------------|-----------------|-----------------|-----------------|--------------|--------------|
|                | $T_{in}$     | $Z_{out,w}$     | $T_{out,d}$  | $M_{out}$       | $S_R$           | $M$             | $S_1$           | $S_2$           | Fretest1     | Fretest2     |
| HC 36, 55, 25  |              |                 |              |                 |                 |                 |                 |                 |              |              |
| C1 vs C2       | <b>0.020</b> | 0.139           | 0.513        | 0.314           | <b>0.028</b>    | 0.054           | 0.812           | 0.060           | 0.718        | 0.547        |
| C1 vs C3       | <b>0.004</b> | <b>&lt;1e-3</b> | 0.867        | <b>&lt;1e-3</b> | <b>&lt;1e-3</b> | <b>&lt;1e-3</b> | <b>&lt;1e-3</b> | <b>&lt;1e-3</b> | 0.078        | 0.116        |
| C2 vs C3       | 0.201        | <b>0.001</b>    | 0.781        | <b>0.002</b>    | <b>0.007</b>    | <b>0.003</b>    | 0.332           | <b>0.008</b>    | 0.272        | 0.369        |
| MDD 21, 62, 20 |              |                 |              |                 |                 |                 |                 |                 |              |              |
| C1 vs C2       | 0.383        | 0.295           | 0.879        | 0.680           | 0.639           | 0.596           | 0.543           | 0.617           | 0.053        | 0.060        |
| C1 vs C3       | 0.160        | <b>0.012</b>    | 0.841        | <b>0.024</b>    | <b>0.044</b>    | <b>0.033</b>    | <b>0.048</b>    | 0.144           | <b>0.011</b> | <b>0.033</b> |
| C2 vs C3       | 0.546        | 0.464           | 0.725        | 0.769           | 0.850           | 0.746           | 0.745           | 0.819           | 0.862        | 0.674        |
| weekends       |              |                 |              |                 |                 |                 |                 |                 |              |              |
|                | $T_{in}$     | $Z_{out,w}$     | $T_{out,d}$  | $M_{out}$       | $S_R$           | $M$             | $S_1$           | $S_2$           | Fretest1     | Fretest2     |
| HC 36, 53, 26  |              |                 |              |                 |                 |                 |                 |                 |              |              |
| C1 vs C2       | 0.722        | 0.069           | 0.349        | 0.147           | 0.261           | 0.215           | 0.120           | 0.241           | 0.655        | 0.159        |
| C1 vs C3       | 0.317        | <b>0.001</b>    | <b>0.013</b> | <b>&lt;1e-3</b> | <b>&lt;1e-3</b> | <b>0.001</b>    | <b>0.047</b>    | <b>0.004</b>    | 0.558        | 0.083        |
| C2 vs C3       | 0.478        | <b>0.027</b>    | <b>0.042</b> | <b>0.035</b>    | <b>0.017</b>    | <b>0.050</b>    | 0.671           | 0.090           | 0.770        | 0.483        |
| MDD 18, 55, 22 |              |                 |              |                 |                 |                 |                 |                 |              |              |
| C1 vs C2       | 0.408        | 0.468           | 0.276        | 0.375           | 0.394           | 0.408           | 0.426           | 0.210           | 0.358        | 0.604        |
| C1 vs C3       | 0.533        | <b>0.025</b>    | 0.155        | <b>0.047</b>    | 0.065           | 0.070           | 0.145           | 0.110           | 0.073        | 0.097        |
| C2 vs C3       | 0.633        | 0.526           | 0.684        | 0.726           | 0.767           | 0.726           | 0.868           | 0.691           | 0.543        | 0.355        |

TABLE 7

Comparisons of activity distributions in different BMI groups, where  $D1$  and  $D2$  denoting lean and obese people, respectively. The  $p$ -values of the proposed test statistics, the generalized edge-count tests ( $S1$ ,  $S2$ ) and Fréchet tests ( $Fretest1$ ,  $Fretest2$ ) are presented for different comparisons (bold for those  $< 0.05$ ).

|              | $T_{in}$ | $Z_{out,w}$  | $T_{out,d}$ | $M_{out}$    | weekdays     |              | $S1$  | $S2$  | Fretest1 | Fretest2 |
|--------------|----------|--------------|-------------|--------------|--------------|--------------|-------|-------|----------|----------|
|              |          |              |             |              | $S_R$        | $M$          |       |       |          |          |
| HC 32, 48    |          |              |             |              |              |              |       |       |          |          |
| D1 vs D2     | 0.815    | 0.837        | 0.487       | 0.621        | 0.645        | 0.776        | 0.809 | 0.788 | 0.529    | 0.390    |
| OTHER 43, 75 |          |              |             |              |              |              |       |       |          |          |
| D1 vs D2     | 0.756    | <b>0.009</b> | 0.163       | <b>0.017</b> | <b>0.040</b> | <b>0.022</b> | 0.384 | 0.614 | 0.826    | 0.858    |
|              | $T_{in}$ | $Z_{out,w}$  | $T_{out,d}$ | $M_{out}$    | weekends     |              | $S1$  | $S2$  | Fretest1 | Fretest2 |
| HC 30, 49    |          |              |             |              |              |              |       |       |          |          |
| D1 vs D2     | 0.579    | 0.718        | 0.366       | 0.493        | 0.490        | 0.566        | 0.636 | 0.375 | 0.262    | 0.168    |
| OTHER 40, 74 |          |              |             |              |              |              |       |       |          |          |
| D1 vs D2     | 0.715    | <b>0.030</b> | 0.223       | 0.063        | 0.133        | 0.094        | 0.372 | 0.803 | 0.533    | 0.673    |



SUPPLEMENT E: SENSIVITY ANALYSIS RESULTS OF REAL APPLICATION WHEN  
USING 5-MST AND 15-MST AS THE SIMILARITY GRAPH

E.1 5-MST with the 2-Wasserstein distance as the similarity graph

TABLE 8

Comparisons of activity distributions among the controls, MDD, BPI and BPII patients. The  $p$ -values are presented for the proposed test statistics, the generalized edge-count tests ( $S_1$ ,  $S_2$ ) and Fréchet tests ( $Fretest1$ ,  $Fretest2$ ) (bold for those  $< 0.05$ ).

| weekdays, $n_1 = 117$ , $n_2 = 106$ , $n_3 = 26$ , $n_4 = 32$ . |          |              |             |              |              |              |              |       |              |              |
|-----------------------------------------------------------------|----------|--------------|-------------|--------------|--------------|--------------|--------------|-------|--------------|--------------|
|                                                                 | $T_{in}$ | $Z_{out,w}$  | $T_{out,d}$ | $M_{out}$    | $S_R$        | $M$          | $S_1$        | $S_2$ | Fretest1     | Fretest2     |
| HC vs MDD                                                       | 0.701    | 0.803        | 0.658       | 0.769        | 0.674        | 0.807        | 0.426        | 0.212 | 0.384        | 0.307        |
| HC vs BPII                                                      | 0.728    | 0.380        | 0.392       | 0.485        | 0.751        | 0.643        | 0.164        | 0.056 | 0.661        | 0.230        |
| HC vs BPI                                                       | 0.592    | 0.192        | 0.730       | 0.433        | 0.657        | 0.523        | 0.611        | 0.754 | 0.262        | 0.104        |
| MDD vs BPII                                                     | 0.834    | 0.390        | 0.134       | 0.210        | 0.354        | 0.303        | 0.176        | 0.181 | 0.711        | 0.767        |
| MDD vs BPI                                                      | 0.773    | 0.263        | 0.544       | 0.496        | 0.734        | 0.636        | 0.620        | 0.577 | 0.705        | 0.485        |
| BPII vs BPI                                                     | 0.712    | 0.137        | 0.260       | 0.250        | 0.265        | 0.348        | 0.508        | 0.116 | 0.124        | 0.127        |
| weekends, $n_1 = 116$ , $n_2 = 98$ , $n_3 = 30$ , $n_4 = 33$ .  |          |              |             |              |              |              |              |       |              |              |
|                                                                 | $T_{in}$ | $Z_{out,w}$  | $T_{out,d}$ | $M_{out}$    | $S_R$        | $M$          | $S_1$        | $S_2$ | Fretest1     | Fretest2     |
| HC vs MDD                                                       | 0.541    | 0.655        | 0.838       | 0.877        | 0.788        | 0.779        | 0.640        | 0.676 | 0.052        | 0.060        |
| HC vs BPII                                                      | 0.405    | 0.491        | 0.725       | 0.723        | 0.691        | 0.592        | 0.596        | 0.403 | 0.542        | 0.515        |
| HC vs BPI                                                       | 0.206    | <b>0.021</b> | 0.092       | <b>0.031</b> | <b>0.023</b> | <b>0.036</b> | 0.275        | 0.077 | <b>0.014</b> | <b>0.002</b> |
| MDD vs BPII                                                     | 0.759    | 0.431        | 0.830       | 0.782        | 0.905        | 0.845        | 0.530        | 0.718 | 0.279        | 0.322        |
| MDD vs BPI                                                      | 0.654    | 0.176        | 0.276       | 0.237        | 0.378        | 0.334        | 0.354        | 0.196 | 0.477        | 0.288        |
| BPII vs BPI                                                     | 0.720    | <b>0.030</b> | 0.670       | 0.065        | 0.209        | 0.095        | <b>0.026</b> | 0.090 | <b>0.007</b> | <b>0.005</b> |

TABLE 9

Comparisons of activity distributions in different age groups, where  $C1$ ,  $C2$  and  $C3$  denoting young, middle-aged and older age groups. The  $p$ -values of the proposed test statistics, the generalized edge-count tests ( $S_1$ ,  $S_2$ ) and Fréchet tests ( $Fretest1$ ,  $Fretest2$ ) are presented for different comparisons (bold for those  $< 0.05$ ).

| weekdays       |              |                 |              |                 |                 |                 |              |                 |              |              |
|----------------|--------------|-----------------|--------------|-----------------|-----------------|-----------------|--------------|-----------------|--------------|--------------|
|                | $T_{in}$     | $Z_{out,w}$     | $T_{out,d}$  | $M_{out}$       | $S_R$           | $M$             | $S_1$        | $S_2$           | Fretest1     | Fretest2     |
| HC 36, 55, 25  |              |                 |              |                 |                 |                 |              |                 |              |              |
| C1 vs C2       | 0.109        | 0.074           | 0.663        | 0.169           | <b>&lt;1e-3</b> | 0.142           | 0.473        | <b>0.044</b>    | 0.709        | 0.559        |
| C1 vs C3       | <b>0.005</b> | <b>&lt;1e-3</b> | 0.723        | <b>&lt;1e-3</b> | <b>&lt;1e-3</b> | <b>&lt;1e-3</b> | <b>0.005</b> | <b>&lt;1e-3</b> | 0.076        | 0.116        |
| C2 vs C3       | 0.143        | <b>&lt;1e-3</b> | 0.725        | <b>0.002</b>    | <b>0.004</b>    | <b>0.002</b>    | 0.395        | <b>0.044</b>    | 0.272        | 0.369        |
| MDD 21, 62, 20 |              |                 |              |                 |                 |                 |              |                 |              |              |
| C1 vs C2       | 0.418        | 0.320           | 0.868        | 0.710           | 0.674           | 0.623           | 0.649        | 0.527           | 0.053        | 0.060        |
| C1 vs C3       | 0.182        | <b>0.029</b>    | 0.800        | 0.062           | 0.100           | 0.079           | 0.126        | 0.182           | <b>0.011</b> | <b>0.033</b> |
| C2 vs C3       | 0.611        | 0.368           | 0.746        | 0.697           | 0.842           | 0.730           | 0.746        | 0.778           | 0.861        | 0.675        |
| weekends       |              |                 |              |                 |                 |                 |              |                 |              |              |
|                | $T_{in}$     | $Z_{out,w}$     | $T_{out,d}$  | $M_{out}$       | $S_R$           | $M$             | $S_1$        | $S_2$           | Fretest1     | Fretest2     |
| HC 36, 53, 26  |              |                 |              |                 |                 |                 |              |                 |              |              |
| C1 vs C2       | 0.656        | 0.093           | 0.587        | 0.201           | 0.356           | 0.278           | 0.317        | 0.215           | 0.661        | 0.157        |
| C1 vs C3       | 0.597        | <b>&lt;1e-3</b> | <b>0.027</b> | <b>&lt;1e-3</b> | <b>&lt;1e-3</b> | <b>0.002</b>    | <b>0.024</b> | <b>0.003</b>    | 0.553        | 0.082        |
| C2 vs C3       | 0.688        | 0.109           | <b>0.048</b> | 0.068           | 0.078           | 0.100           | 0.471        | 0.106           | 0.767        | 0.480        |
| MDD 18, 55, 22 |              |                 |              |                 |                 |                 |              |                 |              |              |
| C1 vs C2       | 0.558        | 0.542           | 0.308        | 0.416           | 0.471           | 0.484           | 0.340        | 0.197           | 0.348        | 0.603        |
| C1 vs C3       | 0.490        | 0.069           | 0.424        | 0.143           | 0.197           | 0.186           | 0.200        | 0.087           | 0.075        | 0.099        |
| C2 vs C3       | 0.716        | 0.580           | 0.447        | 0.553           | 0.656           | 0.640           | 0.801        | 0.588           | 0.553        | 0.359        |

TABLE 10

Comparisons of activity distributions in different BMI groups, where  $D1$  and  $D2$  denoting lean and obese people, respectively. The  $p$ -values of the proposed test statistics, the generalized edge-count tests ( $S1$ ,  $S2$ ) and Fréchet tests ( $Fretest1$ ,  $Fretest2$ ) are presented for different comparisons (bold for those  $< 0.05$ ).

|              | $T_{in}$ | $Z_{out,w}$  | $T_{out,d}$ | $M_{out}$    | weekdays     |              | $S1$  | $S2$  | Fretest1 | Fretest2 |
|--------------|----------|--------------|-------------|--------------|--------------|--------------|-------|-------|----------|----------|
|              |          |              |             |              | $S_R$        | $M$          |       |       |          |          |
| HC 32, 48    |          |              |             |              |              |              |       |       |          |          |
| D1 vs D2     | 0.803    | 0.920        | 0.242       | 0.354        | 0.258        | 0.485        | 0.796 | 0.726 | 0.533    | 0.395    |
| OTHER 43, 75 |          |              |             |              |              |              |       |       |          |          |
| D1 vs D2     | 0.793    | <b>0.011</b> | 0.128       | <b>0.020</b> | <b>0.034</b> | <b>0.029</b> | 0.439 | 0.451 | 0.826    | 0.857    |
|              | $T_{in}$ | $Z_{out,w}$  | $T_{out,d}$ | $M_{out}$    | weekends     |              | $S1$  | $S2$  | Fretest1 | Fretest2 |
| HC 30, 49    |          |              |             |              |              |              |       |       |          |          |
| D1 vs D2     | 0.631    | 0.332        | 0.401       | 0.444        | 0.542        | 0.544        | 0.595 | 0.424 | 0.257    | 0.163    |
| OTHER 40, 74 |          |              |             |              |              |              |       |       |          |          |
| D1 vs D2     | 0.692    | 0.105        | 0.121       | 0.142        | 0.204        | 0.208        | 0.464 | 0.680 | 0.504    | 0.657    |

## E.2 15-MST with the 2-Wasserstein distance as the similarity graph

TABLE 11

Comparisons of activity distributions among the controls, MDD, BPI and BPII patients. The  $p$ -values are presented for the proposed test statistics, the generalized edge-count tests ( $S1$ ,  $S2$ ) and Fréchet tests ( $Fretest1$ ,  $Fretest2$ ) (bold for those  $< 0.05$ ).

| weekdays, $n_1 = 117$ , $n_2 = 106$ , $n_3 = 26$ , $n_4 = 32$ . |          |                  |              |              |              |              |              |              |              |              |
|-----------------------------------------------------------------|----------|------------------|--------------|--------------|--------------|--------------|--------------|--------------|--------------|--------------|
|                                                                 | $T_{in}$ | $Z_{out,w}$      | $T_{out,d}$  | $M_{out}$    | $S_R$        | $M$          | $S1$         | $S2$         | Fretest1     | Fretest2     |
| HC vs MDD                                                       | 0.801    | 0.596            | 0.231        | 0.341        | 0.597        | 0.482        | 0.644        | 0.158        | 0.388        | 0.309        |
| HC vs BPII                                                      | 0.773    | 0.248            | 0.089        | 0.148        | 0.237        | 0.219        | 0.706        | 0.057        | 0.657        | 0.226        |
| HC vs BPI                                                       | 0.759    | 0.056            | 0.886        | 0.055        | 0.222        | 0.081        | 0.781        | 0.623        | 0.257        | 0.103        |
| MDD vs BPII                                                     | 0.540    | 0.451            | 0.055        | 0.064        | 0.059        | 0.094        | 0.574        | 0.089        | 0.717        | 0.762        |
| MDD vs BPI                                                      | 0.787    | 0.058            | 0.755        | 0.107        | 0.333        | 0.154        | 0.746        | 0.778        | 0.696        | 0.482        |
| BPII vs BPI                                                     | 0.354    | 0.051            | 0.147        | 0.051        | 0.058        | 0.059        | 0.113        | 0.189        | 0.122        | 0.126        |
| weekends, $n_1 = 116$ , $n_2 = 98$ , $n_3 = 30$ , $n_4 = 33$ .  |          |                  |              |              |              |              |              |              |              |              |
|                                                                 | $T_{in}$ | $Z_{out,w}$      | $T_{out,d}$  | $M_{out}$    | $S_R$        | $M$          | $S1$         | $S2$         | Fretest1     | Fretest2     |
| HC vs MDD                                                       | 0.329    | 0.390            | 0.392        | 0.468        | 0.513        | 0.443        | 0.459        | 0.699        | 0.051        | 0.059        |
| HC vs BPII                                                      | 0.754    | 0.442            | 0.414        | 0.502        | 0.718        | 0.650        | 0.481        | 0.393        | 0.538        | 0.509        |
| HC vs BPI                                                       | 0.508    | <b>0.001</b>     | <b>0.031</b> | <b>0.001</b> | <b>0.001</b> | <b>0.002</b> | <b>0.007</b> | <b>0.005</b> | <b>0.013</b> | <b>0.002</b> |
| MDD vs BPII                                                     | 0.319    | 0.348            | 0.848        | 0.711        | 0.609        | 0.499        | 0.545        | 0.748        | 0.276        | 0.317        |
| MDD vs BPI                                                      | 0.620    | <b>0.038</b>     | 0.218        | 0.073        | 0.122        | 0.107        | 0.072        | 0.078        | 0.482        | 0.288        |
| BPII vs BPI                                                     | 0.768    | <b>&lt; 1e-3</b> | 0.168        | <b>0.001</b> | <b>0.003</b> | <b>0.001</b> | <b>0.003</b> | <b>0.006</b> | <b>0.007</b> | <b>0.005</b> |

TABLE 12

Comparisons of activity distributions in different age groups, where  $C1$ ,  $C2$  and  $C3$  denoting young, middle-aged and older age groups. The  $p$ -values of the proposed test statistics, the generalized edge-count tests ( $S1$ ,  $S2$ ) and Fréchet tests ( $Fretest1$ ,  $Fretest2$ ) are presented for different comparisons (bold for those  $< 0.05$ ).

| weekdays       |              |                  |              |                  |                  |                  |                  |                  |              |              |
|----------------|--------------|------------------|--------------|------------------|------------------|------------------|------------------|------------------|--------------|--------------|
|                | $T_{in}$     | $Z_{out,w}$      | $T_{out,d}$  | $M_{out}$        | $S_R$            | $M$              | $S1$             | $S2$             | Fretest1     | Fretest2     |
| HC 36, 55, 25  |              |                  |              |                  |                  |                  |                  |                  |              |              |
| C1 vs C2       | <b>0.023</b> | 0.073            | 0.368        | 0.165            | <b>0.020</b>     | 0.055            | 0.859            | 0.083            | 0.717        | 0.551        |
| C1 vs C3       | <b>0.001</b> | <b>&lt; 1e-3</b> | 0.577        | <b>&lt; 1e-3</b> | 0.076        | 0.115        |
| C2 vs C3       | 0.074        | <b>&lt; 1e-3</b> | 0.726        | <b>0.001</b>     | <b>0.001</b>     | <b>0.001</b>     | <b>0.011</b>     | <b>0.003</b>     | 0.268        | 0.366        |
| MDD 21, 62, 20 |              |                  |              |                  |                  |                  |                  |                  |              |              |
| C1 vs C2       | 0.250        | 0.259            | 0.885        | 0.613            | 0.467            | 0.456            | 0.470            | 0.755            | 0.053        | 0.061        |
| C1 vs C3       | 0.059        | <b>0.006</b>     | 0.885        | <b>0.010</b>     | <b>0.006</b>     | <b>0.013</b>     | <b>0.005</b>     | <b>0.020</b>     | <b>0.011</b> | <b>0.033</b> |
| C2 vs C3       | 0.399        | 0.401            | 0.815        | 0.781            | 0.772            | 0.644            | 0.705            | 0.863            | 0.858        | 0.677        |
| weekends       |              |                  |              |                  |                  |                  |                  |                  |              |              |
|                | $T_{in}$     | $Z_{out,w}$      | $T_{out,d}$  | $M_{out}$        | $S_R$            | $M$              | $S1$             | $S2$             | Fretest1     | Fretest2     |
| HC 36, 53, 26  |              |                  |              |                  |                  |                  |                  |                  |              |              |
| C1 vs C2       | 0.455        | 0.059            | 0.145        | 0.091            | 0.089            | 0.129            | 0.189            | 0.307            | 0.670        | 0.158        |
| C1 vs C3       | <b>0.050</b> | <b>0.002</b>     | <b>0.005</b> | <b>0.002</b>     | <b>&lt; 1e-3</b> | <b>0.003</b>     | 0.187            | <b>0.021</b>     | 0.556        | 0.083        |
| C2 vs C3       | 0.311        | <b>0.042</b>     | 0.058        | 0.056            | <b>0.026</b>     | 0.076            | 0.722            | 0.096            | 0.769        | 0.481        |
| MDD 18, 55, 22 |              |                  |              |                  |                  |                  |                  |                  |              |              |
| C1 vs C2       | 0.181        | 0.395            | 0.295        | 0.395            | 0.285            | 0.289            | 0.837            | 0.452            | 0.350        | 0.607        |
| C1 vs C3       | 0.370        | <b>0.039</b>     | 0.116        | 0.068            | 0.057            | 0.096            | <b>0.005</b>     | <b>0.021</b>     | 0.071        | 0.095        |
| C2 vs C3       | 0.624        | 0.369            | 0.865        | 0.762            | 0.856            | 0.776            | 0.906            | 0.699            | 0.545        | 0.359        |

TABLE 13

Comparisons of activity distributions in different BMI groups, where  $D1$  and  $D2$  denoting lean and obese people, respectively. The  $p$ -values of the proposed test statistics, the generalized edge-count tests ( $S1$ ,  $S2$ ) and Fréchet tests ( $Fretest1$ ,  $Fretest2$ ) are presented for different comparisons (bold for those  $< 0.05$ ).

|              | weekdays |              |             |              |              |              |       |       |            |            |
|--------------|----------|--------------|-------------|--------------|--------------|--------------|-------|-------|------------|------------|
|              | $T_{in}$ | $Z_{out,w}$  | $T_{out,d}$ | $M_{out}$    | $S_R$        | $M$          | $S1$  | $S2$  | $Fretest1$ | $Fretest2$ |
| HC 32, 48    |          |              |             |              |              |              |       |       |            |            |
| D1 vs D2     | 0.843    | 0.717        | 0.649       | 0.767        | 0.874        | 0.891        | 0.886 | 0.826 | 0.531      | 0.394      |
| OTHER 43, 75 |          |              |             |              |              |              |       |       |            |            |
| D1 vs D2     | 0.793    | <b>0.006</b> | 0.263       | <b>0.011</b> | <b>0.043</b> | <b>0.016</b> | 0.496 | 0.833 | 0.825      | 0.856      |
|              | weekends |              |             |              |              |              |       |       |            |            |
|              | $T_{in}$ | $Z_{out,w}$  | $T_{out,d}$ | $M_{out}$    | $S_R$        | $M$          | $S1$  | $S2$  | $Fretest1$ | $Fretest2$ |
| HC 30, 49    |          |              |             |              |              |              |       |       |            |            |
| D1 vs D2     | 0.609    | 0.861        | 0.496       | 0.628        | 0.480        | 0.689        | 0.672 | 0.340 | 0.256      | 0.167      |
| OTHER 40, 74 |          |              |             |              |              |              |       |       |            |            |
| D1 vs D2     | 0.763    | <b>0.031</b> | 0.422       | 0.065        | 0.195        | 0.098        | 0.690 | 0.673 | 0.482      | 0.643      |

## E.3 5-MST with the maximum mean discrepancy as the similarity graph

TABLE 14

Comparisons of activity distributions among the controls, MDD, BPI and BPII patients. The  $p$ -values are presented for the proposed test statistics, the generalized edge-count tests ( $S1$ ,  $S2$ ) and Fréchet tests ( $Fretest1$ ,  $Fretest2$ ) (bold for those  $< 0.05$ ).

| weekdays, $n_1 = 117$ , $n_2 = 106$ , $n_3 = 26$ , $n_4 = 32$ . |          |              |             |              |       |       |       |       |              |              |
|-----------------------------------------------------------------|----------|--------------|-------------|--------------|-------|-------|-------|-------|--------------|--------------|
|                                                                 | $T_{in}$ | $Z_{out,w}$  | $T_{out,d}$ | $M_{out}$    | $S_R$ | $M$   | $S1$  | $S2$  | Fretest1     | Fretest2     |
| HC vs MDD                                                       | 0.730    | 0.810        | 0.603       | 0.714        | 0.629 | 0.774 | 0.718 | 0.504 | 0.382        | 0.307        |
| HC vs BPII                                                      | 0.735    | 0.062        | 0.744       | 0.133        | 0.302 | 0.182 | 0.466 | 0.322 | 0.656        | 0.230        |
| HC vs BPI                                                       | 0.644    | 0.205        | 0.774       | 0.435        | 0.634 | 0.507 | 0.768 | 0.758 | 0.259        | 0.103        |
| MDD vs BPII                                                     | 0.801    | 0.115        | 0.616       | 0.221        | 0.426 | 0.310 | 0.549 | 0.321 | 0.712        | 0.768        |
| MDD vs BPI                                                      | 0.706    | 0.343        | 0.738       | 0.608        | 0.782 | 0.684 | 0.761 | 0.759 | 0.700        | 0.483        |
| BPII vs BPI                                                     | 0.708    | 0.053        | 0.672       | 0.071        | 0.177 | 0.101 | 0.600 | 0.306 | 0.121        | 0.124        |
| weekends, $n_1 = 116$ , $n_2 = 98$ , $n_3 = 30$ , $n_4 = 33$ .  |          |              |             |              |       |       |       |       |              |              |
|                                                                 | $T_{in}$ | $Z_{out,w}$  | $T_{out,d}$ | $M_{out}$    | $S_R$ | $M$   | $S1$  | $S2$  | Fretest1     | Fretest2     |
| HC vs MDD                                                       | 0.511    | 0.912        | 0.733       | 0.824        | 0.447 | 0.696 | 0.614 | 0.743 | 0.062        | 0.060        |
| HC vs BPII                                                      | 0.593    | 0.593        | 0.716       | 0.755        | 0.745 | 0.726 | 0.636 | 0.316 | 0.553        | 0.523        |
| HC vs BPI                                                       | 0.456    | 0.066        | 0.190       | 0.087        | 0.119 | 0.112 | 0.144 | 0.093 | <b>0.014</b> | <b>0.002</b> |
| MDD vs BPII                                                     | 0.391    | 0.600        | 0.753       | 0.778        | 0.585 | 0.561 | 0.728 | 0.439 | 0.267        | 0.310        |
| MDD vs BPI                                                      | 0.689    | 0.243        | 0.257       | 0.236        | 0.378 | 0.329 | 0.296 | 0.143 | 0.485        | 0.284        |
| BPII vs BPI                                                     | 0.409    | <b>0.021</b> | 0.359       | <b>0.041</b> | 0.078 | 0.055 | 0.127 | 0.340 | <b>0.007</b> | <b>0.005</b> |

TABLE 15

Comparisons of activity distributions in different age groups, where  $C1$ ,  $C2$  and  $C3$  denoting young, middle-aged and older age groups. The  $p$ -values of the proposed test statistics, the generalized edge-count tests ( $S1$ ,  $S2$ ) and Fréchet tests ( $Fretest1$ ,  $Fretest2$ ) are presented for different comparisons (bold for those  $< 0.05$ ).

| weekdays       |              |                  |             |                  |                  |                  |              |                  |              |              |
|----------------|--------------|------------------|-------------|------------------|------------------|------------------|--------------|------------------|--------------|--------------|
|                | $T_{in}$     | $Z_{out,w}$      | $T_{out,d}$ | $M_{out}$        | $S_R$            | $M$              | $S1$         | $S2$             | Fretest1     | Fretest2     |
| HC 36, 55, 25  |              |                  |             |                  |                  |                  |              |                  |              |              |
| C1 vs C2       | 0.409        | <b>0.036</b>     | 0.725       | 0.082            | 0.156            | 0.106            | 0.708        | 0.495            | 0.713        | 0.550        |
| C1 vs C3       | <b>0.029</b> | <b>&lt; 1e-3</b> | 0.270       | <b>&lt; 1e-3</b> | <b>&lt; 1e-3</b> | <b>&lt; 1e-3</b> | <b>0.002</b> | <b>&lt; 1e-3</b> | 0.076        | 0.115        |
| C2 vs C3       | 0.206        | <b>0.002</b>     | 0.669       | <b>0.005</b>     | <b>0.010</b>     | <b>0.006</b>     | 0.154        | 0.062            | 0.272        | 0.369        |
| MDD 21, 62, 20 |              |                  |             |                  |                  |                  |              |                  |              |              |
| C1 vs C2       | 0.396        | 0.121            | 0.801       | 0.281            | 0.313            | 0.278            | 0.425        | 0.332            | 0.053        | 0.060        |
| C1 vs C3       | 0.206        | <b>0.002</b>     | 0.742       | <b>0.005</b>     | <b>0.012</b>     | <b>0.006</b>     | 0.191        | 0.230            | <b>0.011</b> | <b>0.032</b> |
| C2 vs C3       | 0.744        | 0.183            | 0.624       | 0.380            | 0.602            | 0.482            | 0.779        | 0.793            | 0.863        | 0.681        |
| weekends       |              |                  |             |                  |                  |                  |              |                  |              |              |
|                | $T_{in}$     | $Z_{out,w}$      | $T_{out,d}$ | $M_{out}$        | $S_R$            | $M$              | $S1$         | $S2$             | Fretest1     | Fretest2     |
| HC 36, 53, 26  |              |                  |             |                  |                  |                  |              |                  |              |              |
| C1 vs C2       | 0.696        | <b>0.012</b>     | 0.721       | <b>0.027</b>     | 0.079            | <b>0.037</b>     | 0.291        | 0.353            | 0.657        | 0.157        |
| C1 vs C3       | 0.612        | <b>0.002</b>     | 0.538       | <b>0.004</b>     | <b>0.011</b>     | <b>0.005</b>     | <b>0.014</b> | <b>0.009</b>     | 0.554        | 0.081        |
| C2 vs C3       | 0.664        | 0.091            | 0.492       | 0.162            | 0.278            | 0.223            | 0.259        | 0.154            | 0.771        | 0.482        |
| MDD 18, 55, 22 |              |                  |             |                  |                  |                  |              |                  |              |              |
| C1 vs C2       | 0.480        | 0.270            | 0.413       | 0.344            | 0.481            | 0.406            | 0.468        | 0.237            | 0.358        | 0.604        |
| C1 vs C3       | 0.646        | <b>0.041</b>     | 0.721       | 0.091            | 0.220            | 0.126            | 0.094        | 0.104            | 0.073        | 0.096        |
| C2 vs C3       | 0.715        | 0.379            | 0.236       | 0.281            | 0.418            | 0.377            | 0.754        | 0.700            | 0.546        | 0.353        |

TABLE 16

Comparisons of activity distributions in different BMI groups, where  $D1$  and  $D2$  denoting lean and obese people, respectively. The  $p$ -values of the proposed test statistics, the generalized edge-count tests ( $S1$ ,  $S2$ ) and Fréchet tests ( $Fretest1$ ,  $Fretest2$ ) are presented for different comparisons (bold for those  $< 0.05$ ).

|           | weekdays |              |             |              |              |              |       |       |            |            |
|-----------|----------|--------------|-------------|--------------|--------------|--------------|-------|-------|------------|------------|
|           | $T_{in}$ | $Z_{out,w}$  | $T_{out,d}$ | $M_{out}$    | $S_R$        | $M$          | $S1$  | $S2$  | $Fretest1$ | $Fretest2$ |
| HC 32, 48 |          |              |             |              |              |              |       |       |            |            |
| D1 vs D2  | 0.770    | 0.798        | 0.501       | 0.614        | 0.624        | 0.716        | 0.774 | 0.713 | 0.533      | 0.400      |
| D1 vs D2  | 0.794    | <b>0.008</b> | 0.284       | <b>0.015</b> | <b>0.038</b> | <b>0.021</b> | 0.319 | 0.235 | 0.826      | 0.861      |
|           | weekends |              |             |              |              |              |       |       |            |            |
|           | $T_{in}$ | $Z_{out,w}$  | $T_{out,d}$ | $M_{out}$    | $S_R$        | $M$          | $S1$  | $S2$  | $Fretest1$ | $Fretest2$ |
| HC 30, 49 |          |              |             |              |              |              |       |       |            |            |
| D1 vs D2  | 0.630    | 0.467        | 0.559       | 0.584        | 0.658        | 0.635        | 0.697 | 0.681 | 0.258      | 0.168      |
| D1 vs D2  | 0.697    | 0.134        | 0.592       | 0.293        | 0.490        | 0.404        | 0.551 | 0.455 | 0.531      | 0.697      |

SUPPLEMENT F: SENSITIVITY ANALYSES OF RANDOM SUBSETTING  $L$  DAYS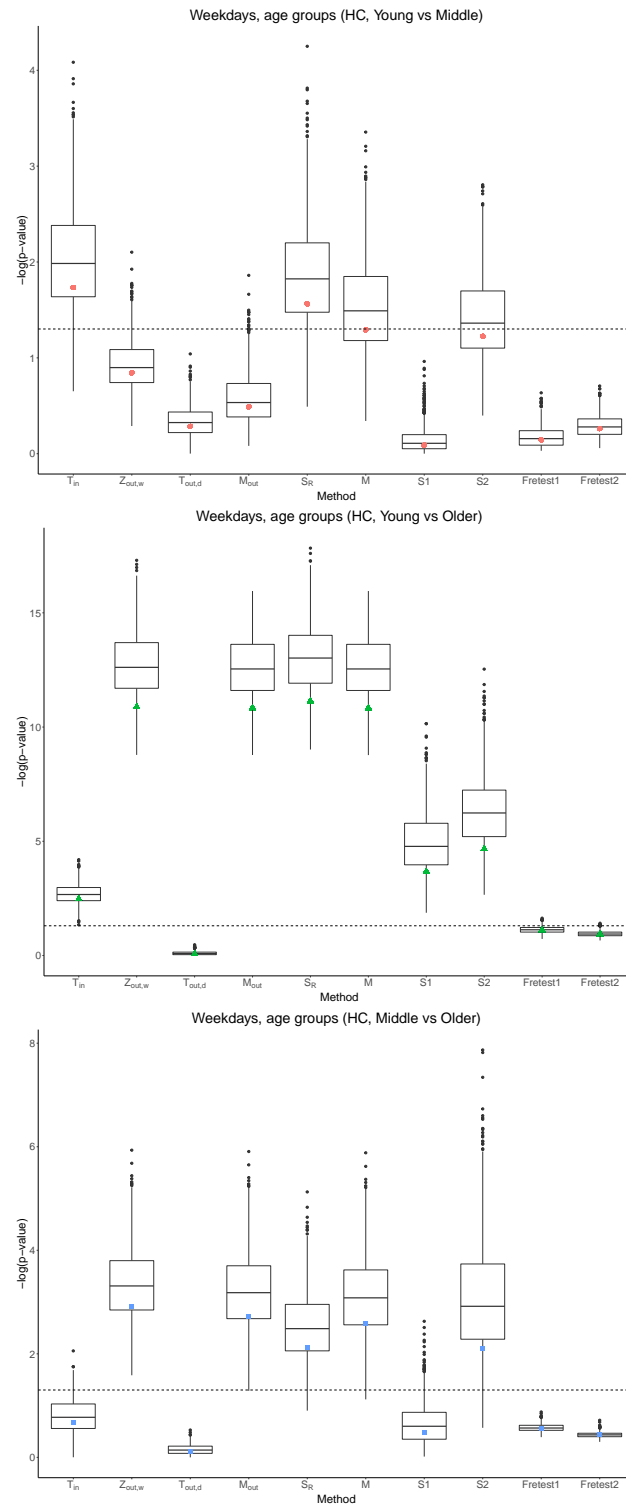

FIG 4. Boxplots of  $-\log(p\text{-value})$  for age group comparison over 1000 random subsetting  $l$  days of data to be included in the analysis. Results are shown for each test statistics using weekday data. Overall the  $p$  values were shown to be robust towards choices of days.

## REFERENCES

- CHEN, L. H. and SHAO, Q.-M. (2005). Stein's method for normal approximation. *An introduction to Stein's method* 4 1–59.
